# Supplementary material for: Transcriptomic Responses of Deep-Sea Corals Experimentally Exposed to Crude Oil and Dispersant
Source: Frontiers journal article supplement (doi:10.3389/fmars.2021.649909), 2021-04-08
Supplement: Table_3.XLSX [file Table_3.XLSX]

## Sheet: Full_summary_BULK
KO term - BULK	OIL		DISP			OIL/DISP
	P. type B3	C. delta	P. type B3	C. delta	Both	P. type B3	C. delta	Both
01100 Metabolic pathways (1)						K12298 query_name: Transcript_178057
Lipid metabolism
00100 Steroid biosynthesis (1)						K12298 query_name: Transcript_178057
00561 Glycerolipid metabolism (1)						K12298 query_name: Transcript_178057
00564 Glycerophospholipid metabolism (1)						K01049 query_name: Transcript_178050, Transcript_178052
Xenobiotics biodegradation and metabolism
00983 Drug metabolism - other enzymes (1)						K01044 query_name: Transcript_121066
Environmental Information Processing
Signal transduction
04391 Hippo signaling pathway - fly (2)						K16507 Transcript_302767 K16669 Transcript_120182, Transcript_275115, Transcript_277528, Transcript_284170, Transcript_303294
04151 PI3K-Akt signaling pathway (1)					K06238 Para: Transcript_104789, Transcript_104790 Callo: Transcript_73165
Signaling molecules and interaction
04512 ECM-receptor interaction (1)					K06238 Para: Transcript_104789, Transcript_104790 Callo: Transcript_73165
Cellular Processes
Cellular community - eukaryotes
04510 Focal adhesion (1)					K06238 Para: Transcript_104789, Transcript_104790 Callo: Transcript_73165
Organismal Systems
Immune system
04610 Complement and coagulation cascades (1)					K03899 Para: Callo: Transcript_41530
Digestive system
04974 Protein digestion and absorption (2)					K06238 Callo: Transcript_73165 Para: Transcript_104789, Transcript_104790 K08606 Callo: Transcript_81651, Transcript_81656, Transcript_81657, Transcript_81659, Transcript_81660, Transcript_81665, Transcript_81667 Para: Transcript_155337, Transcript_155343, Transcript_155346, Transcript_155347, Transcript_184528
04972 Pancreatic secretion (1)						K12298 query_name: Transcript_178057
04975 Fat digestion and absorption (1)						K12298 query_name: Transcript_178057
Nervous system
04725 Cholinergic synapse (1)						K01049 query_name: Transcript_178050, Transcript_178052

## Sheet: Full_summary_WAF
KO term - WAF		OIL		DISP		OIL/DISP
	P. type B3	C. delta	Both	P. type B3	C. delta	P. type B3	C. delta	Both
01100 Metabolic pathways (31)		Transcript_60732, Transcript_60735, Transcript_60739 K00472 Transcript_24067, Transcript_27418, Transcript_27430 K00558 Transcript_84691 K00645 Transcript_11411, Transcript_11412 K00847 Transcript_13482 K01047 Transcript_25538 K01091 Transcript_9350 K01135 Transcript_17503 K01229 Transcript_84694 K01480 Transcript_52019 K01495 Transcript_103457, Transcript_103460, Transcript_103462, Transcript_10…	ko01000 Enzymes (1) - Peroxidase PXDN K19511 Para: Transcript_57312, Callo: Transcript_131470	K00472 Transcript_172334, Transcript_172335, Transcript_172336, Transcript_172338, Transcript_172339, Transcript_172340, Transcript_172342, Transcript_172343, Transcript_172346, Transcript_172349, Transcript_172352, Transcript_172353, Transcript_172354, Transcript_172355, Transcript_172356, Transcript_172358, Transcript_172360, Transcript_172361, Transcript_172364 K13755 Transcript_206885	K00128 Transcript_100297 K00512 Transcript_86898 K00799 Transcript_64330 K01047 Transcript_25540 K01768 Transcript_46201, Transcript_46202, Transcript_46214, Transcript_46221 K02437 Transcript_49472, Transcript_49474 K11150 Transcript_58598 K14379 Transcript_117409 K17398 Transcript_71729 K17399 Transcript_71729 K18533 Transcript_19418 K18592 Transcript_121260, Transcript_19331 K20795 Transcript_…	K00933 Transcript_193812 K01195 Transcript_262316, Transcript_262317, Transcript_262325, Transcript_262326 K14073 Transcript_24413 K14074 Transcript_24415 K14075 Transcript_24413, Transcript_24415	K00130 Transcript_79812, Transcript_79815 K00231 Transcript_27114 K00418 Transcript_101559 K00432 Transcript_4708 K00549 Transcript_55010, Transcript_55014, Transcript_55020 K00615 Transcript_19812 K00626 Transcript_12121 K00851 Transcript_28200 K00852 Transcript_63476 K01082 Transcript_17159 K01106 Transcript_42813 K01596 Transcript_99077 K01754 Transcript_47024 K01758 Transcript_46088 K01759 Tr…
01110 Biosynthesis of secondary metabolites (10)		K00645 Transcript_11411, Transcript_11412 K00847 Transcript_13482 K01047 Transcript_25538 K01091 Transcript_9350 K01513 Transcript_88999 K01596 Transcript_89004, Transcript_89009 K05350 Transcript_84694 K06134 Transcript_28016, Transcript_28018 K12047 Transcript_72013 K16342 Transcript_1208, Transcript_80584, Transcript_102695, Transcript_102696, Transcript_102697, Transcript_102701, Transcript_1…			K00128 Transcript_100297 K01047 Transcript_25540 K02437 Transcript_49472, Transcript_49474 K18533 Transcript_19418 K21294 Transcript_72132	K01195 Transcript_262316, Transcript_262317, Transcript_262325, Transcript_262326	K00231 Transcript_27114 K00549 Transcript_55010, Transcript_55014, Transcript_55020 K00615 Transcript_19812 K00626 Transcript_12121 K00851 Transcript_28200 K01596 Transcript_99077 K01754 Transcript_47024 K01758 Transcript_46088 K01858 Transcript_84684, Transcript_84690, Transcript_84695 K01961 Transcript_61279
01120 Microbial metabolism in diverse environments (7)		K01596 Transcript_89004, Transcript_89009			K00128 Transcript_100297		K00615 Transcript_19812 K00626 Transcript_12121 K00851 Transcript_28200 K01082 Transcript_17159 K01596 Transcript_99077 K01961 Transcript_61279
01130 Biosynthesis of antibiotics (8)
01200 Carbon metabolism (6)					K02437 Transcript_49472, Transcript_49474		K00615 Transcript_19812 K00626 Transcript_12121 K00851 Transcript_28200 K01754 Transcript_47024 K01961 Transcript_61279
01212 Fatty acid metabolism (2)		K00645 Transcript_11411, Transcript_11412					K00626 Transcript_12121 K01961 Transcript_61279
01230 Biosynthesis of amino acids (4)							K00549 Transcript_55010, Transcript_55014, Transcript_55020 K00615 Transcript_19812 K01754 Transcript_47024 K01758 Transcript_46088
Carbohydrate metabolism
00010 Glycolysis / Gluconeogenesis (1)		K01596 Transcript_89004, Transcript_89009			K00128 Transcript_100297		K01596 Transcript_99077
00053 Ascorbate and aldarate metabolism (1)					K00128 Transcript_100297
00020 Citrate cycle (TCA cycle) (1)		K01596 Transcript_89004, Transcript_89009					K01596 Transcript_99077
00030 Pentose phosphate pathway (3)							K00615 Transcript_19812 K00851 Transcript_28200 K00852 Transcript_63476
00040 Pentose and glucuronate interconversions (1)						K01195 Transcript_262316, Transcript_262317, Transcript_262325, Transcript_262326
00051 Fructose and mannose metabolism (1)		K00847 Transcript_13482 K14634 Transcript_94787, Transcript_94790, Transcript_94802, Transcript_94803
00052 Galactose metabolism (2)		K01229 Transcript_84694 K12047 Transcript_72013
00500 Starch and sucrose metabolism (4)		K00847 Transcript_13482 K01513 Transcript_88999 K05350 Transcript_84694 K12047 Transcript_72013
00520 Amino sugar and nucleotide sugar metabolism (2)		K00847 Transcript_13482					K00326 Transcript_22816
00620 Pyruvate metabolism (4)		K01596 Transcript_89004, Transcript_89009			K00128 Transcript_100297		K00626 Transcript_12121 K01596 Transcript_99077 K01759 Transcript_33736 K01961 Transcript_61279
00630 Glyoxylate and dicarboxylate metabolism (1)		K01091 Transcript_9350			K02437 Transcript_49472, Transcript_49474		K00626 Transcript_12121
00640 Propanoate metabolism (2)		K18426 Transcript_55094, Transcript_55102					K00626 Transcript_12121 K01961 Transcript_61279
00650 Butanoate metabolism (1)							K00626 Transcript_12121
00562 Inositol phosphate metabolism (2)							K01106 Transcript_42813
Energy metabolism
00190 Oxidative phosphorylation (2)							K00418 Transcript_101559
00710 Carbon fixation in photosynthetic organisms (1)							K00615 Transcript_19812
00720 Carbon fixation pathways in prokaryotes (2)							K00626 Transcript_12121 K01961 Transcript_61279
00910 Nitrogen metabolism (1)							K00261 Transcript_83490, Transcript_83491
00920 Sulfur metabolism (1)							K01082 Transcript_17159
Lipid metabolism
00061 Fatty acid biosynthesis (1)		K00645 Transcript_11411, Transcript_11412					K01961 Transcript_61279
00071 Fatty acid degradation (1)					K00128 Transcript_100297		K00626 Transcript_12121
00140 Steroid hormone biosynthesis (1)		K15680 Transcript_53293, Transcript_53315			K00512 Transcript_86898
00072 Synthesis and degradation of ketone bodies (1)							K00626 Transcript_12121
00561 Glycerolipid metabolism (2)					K00128 Transcript_100297	K14073 Transcript_24413 K14074 Transcript_24415 K14075 Transcript_24413, Transcript_24415	K14457 Transcript_60084 K14458 Transcript_60084
00564 Glycerophospholipid metabolism (1)		K01047 Transcript_25538 K16342 Transcript_1208, Transcript_80584, Transcript_102695, Transcript_102696, Transcript_102697, Transcript_102701, Transcript_102704, Transcript_102705, Transcript_102709, Transcript_102711, Transcript_18711, Transcript_18712, Transcript_18713, Transcript_18715, Transcript_18716, Transcript_18717			K01047 Transcript_25540		K01049 Transcript_106575, Transcript_16584, Transcript_16586, Transcript_16588
00565 Ether lipid metabolism (1)		K01047 Transcript_25538 K16342 Transcript_1208, Transcript_80584, Transcript_102695, Transcript_102696, Transcript_102697, Transcript_102701, Transcript_102704, Transcript_102705, Transcript_102709, Transcript_102711, Transcript_18711, Transcript_18712, Transcript_18713, Transcript_18715, Transcript_18716, Transcript_18717			K01047 Transcript_25540
00600 Sphingolipid metabolism (1)							K17108 Transcript_62404, Transcript_62406
00590 Arachidonic acid metabolism (2)		K00461 Transcript_60732, Transcript_60735, Transcript_60739 K01047 Transcript_25538 K16342 Transcript_1208, Transcript_80584, Transcript_102695, Transcript_102696, Transcript_102697, Transcript_102701, Transcript_102704, Transcript_102705, Transcript_102709, Transcript_102711, Transcript_18711, Transcript_18712, Transcript_18713, Transcript_18715, Transcript_18716, Transcript_18717 K18592 Transcr…			K01047 Transcript_25540 K18592 Transcript_121260, Transcript_19331		K00432 Transcript_4708
00591 Linoleic acid metabolism (1)		K01047 Transcript_25538 K16342 Transcript_1208, Transcript_80584, Transcript_102695, Transcript_102696, Transcript_102697, Transcript_102701, Transcript_102704, Transcript_102705, Transcript_102709, Transcript_102711, Transcript_18711, Transcript_18712, Transcript_18713, Transcript_18715, Transcript_18716, Transcript_18717			K01047 Transcript_25540
00592 alpha-Linolenic acid metabolism (1)		K01047 Transcript_25538 K16342 Transcript_1208, Transcript_80584, Transcript_102695, Transcript_102696, Transcript_102697, Transcript_102701, Transcript_102704, Transcript_102705, Transcript_102709, Transcript_102711, Transcript_18711, Transcript_18712, Transcript_18713, Transcript_18715, Transcript_18716, Transcript_18717			K01047 Transcript_25540
Nucleotide metabolism
00230 Purine metabolism (1)		K01513 Transcript_88999		K13755 Transcript_206885	K01768 Transcript_46201, Transcript_46202, Transcript_46214, Transcript_46221 K18533 Transcript_19418
00240 Pyrimidine metabolism (1)		K01513 Transcript_88999			K18533 Transcript_19418
Amino acid metabolism
00250 Alanine, aspartate and glutamate metabolism (1)
00260 Glycine, serine and threonine metabolism (3)					K02437 Transcript_49472, Transcript_49474		K00130 Transcript_79812, Transcript_79815 K01754 Transcript_47024 K01758 Transcript_46088
00270 Cysteine and methionine metabolism (2)		K00558 Transcript_84691			K17398 Transcript_71729 K17399 Transcript_71729		K00549 Transcript_55010, Transcript_55014, Transcript_55020 K01758 Transcript_46088
00280 Valine, leucine and isoleucine degradation (1)					K00128 Transcript_100297		K00626 Transcript_12121
00290 Valine, leucine and isoleucine biosynthesis (1)							K01754 Transcript_47024
00310 Lysine degradation (3)					K00128 Transcript_100297 K20795 Transcript_35282		K00626 Transcript_12121 K11429 Transcript_21166, Transcript_21174
00330 Arginine and proline metabolism (1)		K00472 Transcript_24067, Transcript_27418, Transcript_27430 K01480 Transcript_52019 K13366 Transcript_21716		K00472 Transcript_172334, Transcript_172335, Transcript_172336, Transcript_172338, Transcript_172339, Transcript_172340, Transcript_172342, Transcript_172343, Transcript_172346, Transcript_172349, Transcript_172352, Transcript_172353, Transcript_172354, Transcript_172355, Transcript_172356, Transcript_172358, Transcript_172360, Transcript_172361, Transcript_172364	K00128 Transcript_100297	K00933 Transcript_193812
00220 Arginine biosynthesis (1)							K01941 Transcript_61279
00340 Histidine metabolism (1)					K00128 Transcript_100297
00380 Tryptophan metabolism (1)		K01556 Transcript_58494			K00128 Transcript_100297		K00626 Transcript_12121
Metabolism of other amino acids
00410 beta-Alanine metabolism (1)		K13366 Transcript_21716			K00128 Transcript_100297
00430 Taurine and hypotaurine metabolism (1)		K18592 Transcript_56662, Transcript_56664, Transcript_56670			K18592 Transcript_121260, Transcript_19331
00450 Selenocompound metabolism (3)							K00549 Transcript_55010, Transcript_55014, Transcript_55020 K01758 Transcript_46088 K01874 Transcript_75197, Transcript_75199
00460 Cyanoamino acid metabolism (1)		K05350 Transcript_84694 K18592 Transcript_56662, Transcript_56664, Transcript_56670			K18592 Transcript_121260, Transcript_19331
00471 D-Glutamine and D-glutamate metabolism (2)
00480 Glutathione metabolism (3)		K18592 Transcript_56662, Transcript_56664, Transcript_56670			K00799 Transcript_64330 K18592 Transcript_121260, Transcript_19331		K00432 Transcript_4708 K11140 Transcript_53129, Transcript_53131, Transcript_53132, Transcript_53133, Transcript_53134
Glycan biosynthesis and metabolism
00531 Glycosaminoglycan degradation (1)		K01135 Transcript_17503				K01195 Transcript_262316, Transcript_262317, Transcript_262325, Transcript_262326
00563 Glycosylphosphatidylinositol (GPI)-anchor biosynthesis (1)		K03434 Transcript_13222, Transcript_13223
00534 Glycosaminoglycan biosynthesis - heparan sulfate / heparin (2)					K01024 Transcript_44683 K08104 Transcript_44683
00510 N-Glycan biosynthesis (1)							K05546 Transcript_28640, Transcript_28654
00511 Other glycan degradation (2)							K01444 Transcript_93193, Transcript_93199, Transcript_93201, Transcript_93203, Transcript_93205, Transcript_93206, Transcript_93211, Transcript_93212 K17108 Transcript_62404, Transcript_62406
Metabolism of cofactors and vitamins
00740 Riboflavin metabolism (1)		K01513 Transcript_88999			K14379 Transcript_117409
00760 Nicotinate and nicotinamide metabolism (1)		K01513 Transcript_88999
00830 Retinol metabolism (1)		K11150 Transcript_58586, Transcript_58599 K11158 Transcript_20431, Transcript_20434, Transcript_20436, Transcript_20437			K11150 Transcript_58598
00770 Pantothenate and CoA biosynthesis (1)		K01513 Transcript_88999					K09680 Transcript_79137
00790 Folate biosynthesis (1)		K01495 Transcript_103457, Transcript_103460, Transcript_103462, Transcript_103465 K01724 Transcript_8504					K01930 Transcript_95386
00130 Ubiquinone and other terpenoid-quinone biosynthesis (1)		K06134 Transcript_28016, Transcript_28018
00860 Porphyrin and chlorophyll metabolism (1)						K01195 Transcript_262316, Transcript_262317, Transcript_262325, Transcript_262326	K00231 Transcript_27114
Metabolism of terpenoids and polyketides
01054 Nonribosomal peptide structures (1)		K16095 Transcript_113756
00981 Insect hormone biosynthesis (1)					K00128 Transcript_100297
00903 Limonene and pinene degradation (1)					K00128 Transcript_100297
00900 Terpenoid backbone biosynthesis (1)							K00626 Transcript_12121
01051 Biosynthesis of ansamycins (1)							K00615 Transcript_19812
Biosynthesis of other secondary metabolites
00940 Phenylpropanoid biosynthesis (1)		K05350 Transcript_84694
00333 Prodigiosin biosynthesis (1)		K00645 Transcript_11411, Transcript_11412
00404 Staurosporine biosynthesis (1)					K21294 Transcript_72132
00944 Flavone and flavonol biosynthesis (1)						K01195 Transcript_262316, Transcript_262317, Transcript_262325, Transcript_262326
00521 Streptomycin biosynthesis (1)
Xenobiotics biodegradation and metabolism
00625 Chloroalkane and chloroalkene degradation (1)					K00128 Transcript_100297
00980 Metabolism of xenobiotics by cytochrome P450 (1)		K15680 Transcript_53293, Transcript_53315			K00799 Transcript_64330
00982 Drug metabolism - cytochrome P450 (1)					K00799 Transcript_64330
00983 Drug metabolism - other enzymes (1)					K00799 Transcript_64330	K01195 Transcript_262316, Transcript_262317, Transcript_262325, Transcript_262326
00362 Benzoate degradation (1)							K00626 Transcript_12121
00791 Atrazine degradation							K01941 Transcript_61279
Genetic Information Processing
Transcription
03020 RNA polymerase (1)		K03004 Transcript_103636			K14721 Transcript_63782, Transcript_63783
03022 Basal transcription factors (1)		K03122 Transcript_10329, Transcript_10330, Transcript_28737
03040 Spliceosome (4)		K03283 Transcript_113779, Transcript_15689, Transcript_15690 K12879 Transcript_11411, Transcript_11412			K12855 Transcript_16375		K11096 Transcript_56329 K12828 Transcript_37718
Translation
03010 Ribosome (12)		K02911 Transcript_6098 K02959 Transcript_55095					K02864 Transcript_125759 K02878 Transcript_7562, Transcript_7563 K02895 Transcript_14209 K02902 Transcript_4622, Transcript_4623 K02920 Transcript_8593 K02929 Transcript_95123 K02964 Transcript_119112 K02969 Transcript_1612, Transcript_91973	K02966 CALLO: Transcript_94928 PARA:	K02966 CALLO: Transcript_94928 PARA:
00970 Aminoacyl-tRNA biosynthesis (1)							K01874 Transcript_75197, Transcript_75199
03013 RNA transport (2)		K12879 Transcript_11411, Transcript_11412			K03537 Transcript_15611 K14304 Transcript_96342	K14326 Transcript_206454	K03249 Transcript_83959 K14527 Transcript_31004
03015 mRNA surveillance pathway (1)				K06269 Transcript_70303	K14404 Transcript_108147	K14326 Transcript_206454
03008 Ribosome biogenesis in eukaryotes (2)					K03537 Transcript_15611		K14527 Transcript_31004 K14558 Transcript_55244
Folding, sorting and degradation
03060 Protein export (1)							K03106 Transcript_43656
04141 Protein processing in endoplasmic reticulum (3)		K03173 Transcript_67632, Transcript_88747, Transcript_101664 K03283 Transcript_113779, Transcript_15689, Transcript_15690 K05638 Transcript_30556 K08860 Transcript_109440		K11718 Transcript_32533, Transcript_32539	K03173 Transcript_56482, Transcript_56486, Transcript_56487, Transcript_81096, Transcript_81101, Transcript_81102, Transcript_93309, Transcript_101662, Transcript_101665, Transcript_101668, Transcript_101669 K09507 Transcript_48875, Transcript_48878 K09580 Transcript_123953, Transcript_14579 K13984 Transcript_14579 K16194 Transcript_82408, Transcript_82409, Transcript_82410, Transcript_82411, Tra…		K03173 Transcript_56483, Transcript_57116 K05546 Transcript_28640, Transcript_28654 K09584 Transcript_81081, Transcript_81082, Transcript_81087
04120 Ubiquitin mediated proteolysis (7)		K03175 Transcript_57365, Transcript_57367, Transcript_57369, Transcript_57370, Transcript_88744, Transcript_88749 K04696 Transcript_90417, Transcript_90423, Transcript_90425 K10600 Transcript_28769 K10609 Transcript_84691		K03869 Transcript_172901, Transcript_249508 K10587 Transcript_170794, Transcript_170795, Transcript_170796, Transcript_170800			K03175 Transcript_46240, Transcript_46241, Transcript_68501, Transcript_92993, Transcript_92994, Transcript_92997, Transcript_92998, Transcript_93000, Transcript_93001, Transcript_93003, Transcript_93005, Transcript_93006, Transcript_13821 K03357 Transcript_13430 K10143 Transcript_73588 K10447 Transcript_125173 K10583 Transcript_80510, Transcript_80514, Transcript_80516, Transcript_80519 K10611 T…
03050 Proteasome (1)						K02729 Transcript_181983, Transcript_181985, Transcript_181986, Transcript_181987, Transcript_181989	K03030 Transcript_95037, Transcript_95039, Transcript_95040	K02729 CALLO: Transcript_64326, Transcript_64327 PARA: Transcript_181983, Transcript_181985, Transcript_181986, Transcript_181987, Transcript_181989	K02729 CALLO: Transcript_64326, Transcript_64327 PARA: Transcript_181983, Transcript_181985, Transcript_181986, Transcript_181987, Transcript_181989
03018 RNA degradation (6)		K12590 Transcript_65959 K14443 Transcript_19295					K11600 Transcript_15598 K12585 Transcript_97068 K12610 Transcript_77753 K12611 Transcript_77753 K14442 Transcript_59666, Transcript_59667, Transcript_59669, Transcript_59673
Replication and repair
03030 DNA replication (2)							K02324 Transcript_96695 K02541 Transcript_33255
03410 Base excision repair (1)						K10798 Transcript_262170, Transcript_262178	K02324 Transcript_96695
03420 Nucleotide excision repair (1)		K10609 Transcript_84691					K02324 Transcript_96695
03460 Fanconi anemia pathway (2)		K13960 Transcript_121224 K16618 Transcript_6151
03440 Homologous recombination (1)							K03655 Transcript_71385
Environmental Information Processing
Membrane transport
02010 ABC transporters (2)		K05648 Transcript_95395, Transcript_95399 K05658 Transcript_98810 K05659 Transcript_98810 K05681 Transcript_4817				K05643 Transcript_145515, Transcript_145520, Transcript_145533, Transcript_145534 K05673 Transcript_216922, Transcript_217927, Transcript_285300	K05675 Transcript_47940, Transcript_47947, Transcript_47953 K05676 Transcript_47940, Transcript_47947, Transcript_47953
03070 Bacterial secretion system (1)							K03106 Transcript_43656
Signal transduction
02020 Two-component system (1)							K00626 Transcript_12121
04014 Ras signaling pathway (5)		K01047 Transcript_25538 K02678 Transcript_86101, Transcript_86102 K04358 Transcript_13410 K04513 Transcript_8150 K16342 Transcript_1208, Transcript_80584, Transcript_102695, Transcript_102696, Transcript_102697, Transcript_102701, Transcript_102704, Transcript_102705, Transcript_102709, Transcript_102711, Transcript_18711, Transcript_18712, Transcript_18713, Transcript_18715, Transcript_18716, Tr…			K01047 Transcript_25540 K04362 Transcript_65527, Transcript_65528 K04371 Transcript_14018 K04393 Transcript_69502, Transcript_69503 K04513 Transcript_40207, Transcript_40211, Transcript_29196, Transcript_29198, Transcript_29200 K05093 Transcript_65527, Transcript_65528, Transcript_13458 K05094 Transcript_65527, Transcript_65528, Transcript_13458 K05095 Transcript_65528	K04362 Transcript_175758, Transcript_175759, Transcript_175763, Transcript_175771 K05093 Transcript_175758, Transcript_175759, Transcript_175763, Transcript_175771 K05094 Transcript_175758, Transcript_175759, Transcript_175763, Transcript_175771 K05095 Transcript_175758, Transcript_175759, Transcript_175763, Transcript_175771	K04513 Transcript_61247, Transcript_61249, Transcript_61252, Transcript_61259 K05087 Transcript_23849, Transcript_23858 K07941 Transcript_24797 K17632 Transcript_17533	K04362 CALLO: Transcript_82227 PARA: Transcript_175758, Transcript_175759, Transcript_175763, Transcript_175771 K05093 CALLO: Transcript_82227 PARA: Transcript_175758, Transcript_175759, Transcript_175763, Transcript_175771 K05094 CALLO: Transcript_82227 PARA: Transcript_175758, Transcript_175759, Transcript_175763, Transcript_175771 K05095 CALLO: Transcript_82227 PARA: Transcript_175758, Transcr…	K04362 CALLO: Transcript_82227 PARA: Transcript_175758, Transcript_175759, Transcript_175763, Transcript_175771 K05093 CALLO: Transcript_82227 PARA: Transcript_175758, Transcript_175759, Transcript_175763, Transcript_175771 K05094 CALLO: Transcript_82227 PARA: Transcript_175758, Transcript_175759, Transcript_175763, Transcript_175771 K05095 CALLO: Transcript_82227 PARA: Transcript_175758, Transcr…
04015 Rap1 signaling pathway (6)		K04358 Transcript_13410 K04513 Transcript_8150 K06093 Transcript_99822, Transcript_99827			K04266 Transcript_11279 K04362 Transcript_65527, Transcript_65528 K04371 Transcript_14018 K04393 Transcript_69502, Transcript_69503 K04513 Transcript_40207, Transcript_40211, Transcript_29196, Transcript_29198, Transcript_29200 K05093 Transcript_65527, Transcript_65528, Transcript_13458 K05094 Transcript_65527, Transcript_65528, Transcript_13458 K05095 Transcript_65528	K04362 Transcript_175758, Transcript_175759, Transcript_175763, Transcript_175771 K05093 Transcript_175758, Transcript_175759, Transcript_175763, Transcript_175771 K05094 Transcript_175758, Transcript_175759, Transcript_175763, Transcript_175771 K05095 Transcript_175758, Transcript_175759, Transcript_175763, Transcript_175771	K04513 Transcript_61247, Transcript_61249, Transcript_61252, Transcript_61259 K05087 Transcript_23849, Transcript_23858 K05692 Transcript_70692, Transcript_70693, Transcript_70698, Transcript_85504 K06069 Transcript_103342	K04362 CALLO: Transcript_82227 PARA: Transcript_175758, Transcript_175759, Transcript_175763, Transcript_175771 K05093 CALLO: Transcript_82227 PARA: Transcript_175758, Transcript_175759, Transcript_175763, Transcript_175771 K05094 CALLO: Transcript_82227 PARA: Transcript_175758, Transcript_175759, Transcript_175763, Transcript_175771 K05095 CALLO: Transcript_82227 PARA: Transcript_175758, Transcr…	K04362 CALLO: Transcript_82227 PARA: Transcript_175758, Transcript_175759, Transcript_175763, Transcript_175771 K05093 CALLO: Transcript_82227 PARA: Transcript_175758, Transcript_175759, Transcript_175763, Transcript_175771 K05094 CALLO: Transcript_82227 PARA: Transcript_175758, Transcript_175759, Transcript_175763, Transcript_175771 K05095 CALLO: Transcript_82227 PARA: Transcript_175758, Transcr…
04010 MAPK signaling pathway (8)		K03173 Transcript_67632, Transcript_88747, Transcript_101664 K03175 Transcript_57365, Transcript_57367, Transcript_57369, Transcript_57370, Transcript_88744, Transcript_88749 K03283 Transcript_113779, Transcript_15689, Transcript_15690 K04358 Transcript_13410 K04448 Transcript_10875 K04449 Transcript_10875 K04459 Transcript_81504, Transcript_81507, Transcript_81509 K16342 Transcript_1208, Transcr…			K03173 Transcript_56482, Transcript_56486, Transcript_56487, Transcript_81096, Transcript_81101, Transcript_81102, Transcript_93309, Transcript_101662, Transcript_101665, Transcript_101668, Transcript_101669 K04362 Transcript_65527, Transcript_65528 K04371 Transcript_14018 K04393 Transcript_69502, Transcript_69503 K04407 Transcript_68113 K04451 Transcript_54056, Transcript_54058, Transcript_54059…	K04362 Transcript_175758, Transcript_175759, Transcript_175763, Transcript_175771 K05093 Transcript_175758, Transcript_175759, Transcript_175763, Transcript_175771 K05094 Transcript_175758, Transcript_175759, Transcript_175763, Transcript_175771 K05095 Transcript_175758, Transcript_175759, Transcript_175763, Transcript_175771	K03173 Transcript_56483, Transcript_57116 K03175 Transcript_46240, Transcript_46241, Transcript_68501, Transcript_92993, Transcript_92994, Transcript_92997, Transcript_92998, Transcript_93000, Transcript_93001, Transcript_93003, Transcript_93005, Transcript_93006, Transcript_13821 K04420 Transcript_41816, Transcript_41819, Transcript_108837, Transcript_108844, Transcript_108846, Transcript_108850…	K04362 CALLO: Transcript_82227 PARA: Transcript_175758, Transcript_175759, Transcript_175763, Transcript_175771 K05093 CALLO: Transcript_82227 PARA: Transcript_175758, Transcript_175759, Transcript_175763, Transcript_175771 K05094 CALLO: Transcript_82227 PARA: Transcript_175758, Transcript_175759, Transcript_175763, Transcript_175771 K05095 CALLO: Transcript_82227 PARA: Transcript_175758, Transcr…	K04362 CALLO: Transcript_82227 PARA: Transcript_175758, Transcript_175759, Transcript_175763, Transcript_175771 K05093 CALLO: Transcript_82227 PARA: Transcript_175758, Transcript_175759, Transcript_175763, Transcript_175771 K05094 CALLO: Transcript_82227 PARA: Transcript_175758, Transcript_175759, Transcript_175763, Transcript_175771 K05095 CALLO: Transcript_82227 PARA: Transcript_175758, Transcr…
04012 ErbB signaling pathway (1)		K04448 Transcript_10875 K04515 Transcript_29522 K04688 Transcript_35196, Transcript_35197, Transcript_35198			K04371 Transcript_14018
04310 Wnt signaling pathway (6)		K03068 Transcript_88815 K03209 Transcript_15019, Transcript_29256 K04448 Transcript_10875 K04495 Transcript_129280 K04498 Transcript_33840, Transcript_33842, Transcript_95320 K04513 Transcript_8150 K04515 Transcript_29522			K03068 Transcript_88806, Transcript_88807, Transcript_88810, Transcript_88814, Transcript_88816 K04451 Transcript_54056, Transcript_54058, Transcript_54059 K04513 Transcript_40207, Transcript_40211, Transcript_29196, Transcript_29198, Transcript_29200 K05122 Transcript_51666, Transcript_51669 K05123 Transcript_51666, Transcript_51669	K02432 Transcript_179998	K00445 Transcript_12306 K02432 Transcript_22238 K04308 Transcript_57852 K04309 Transcript_57852 K04513 Transcript_61247, Transcript_61249, Transcript_61252, Transcript_61259 K08399 Transcript_57852
04330 Notch signaling pathway (1)		K02599 Transcript_64029, Transcript_64041, Transcript_26495 K04498 Transcript_33840, Transcript_33842, Transcript_95320 K06051 Transcript_26509 K06052 Transcript_26497, Transcript_26507			K02599 Transcript_82624, Transcript_82635, Transcript_9782	K06052 Transcript_111577, Transcript_111579 K21635 Transcript_111577, Transcript_111579	K02599 Transcript_96975
04340 Hedgehog signaling pathway (1)				K03869 Transcript_172901, Transcript_249508	K06229 Transcript_98295	K06225 Transcript_46440 K11101 Transcript_46440		K06225 CALLO: Transcript_80713 PARA: Transcript_46440 K11101 CALLO: Transcript_80713 PARA: Transcript_46440	K06225 CALLO: Transcript_80713 PARA: Transcript_46440 K11101 CALLO: Transcript_80713 PARA: Transcript_46440
04350 TGF-beta signaling pathway (1)		K04498 Transcript_33840, Transcript_33842, Transcript_95320 K04513 Transcript_8150 K04688 Transcript_35196, Transcript_35197, Transcript_35198			K04371 Transcript_14018 K04513 Transcript_40207, Transcript_40211, Transcript_29196, Transcript_29198, Transcript_29200	K16620 Transcript_39062, Transcript_39064	K04513 Transcript_61247, Transcript_61249, Transcript_61252, Transcript_61259	K04663 CALLO: Transcript_52494 PARA: K16620 CALLO: Transcript_52494 PARA: Transcript_39062, Transcript_39064 K16621 CALLO: Transcript_52494 PARA:	K04663 CALLO: Transcript_52494 PARA: K16620 CALLO: Transcript_52494 PARA: Transcript_39062, Transcript_39064 K16621 CALLO: Transcript_52494 PARA:
04390 Hippo signaling pathway (4)		K03209 Transcript_15019, Transcript_29256 K06093 Transcript_99822, Transcript_99827 K16681 Transcript_64029, Transcript_64041		K06269 Transcript_70303	K10148 Transcript_54056, Transcript_54058, Transcript_54059 K16796 Transcript_2935	K02432 Transcript_179998 K16620 Transcript_39062, Transcript_39064	K05692 Transcript_70692, Transcript_70693, Transcript_70698, Transcript_85504 K06069 Transcript_103342	K04663 CALLO: Transcript_52494 PARA: K16620 CALLO: Transcript_52494 PARA: Transcript_39062, Transcript_39064 K16621 CALLO: Transcript_52494 PARA:	K04663 CALLO: Transcript_52494 PARA: K16620 CALLO: Transcript_52494 PARA: Transcript_39062, Transcript_39064 K16621 CALLO: Transcript_52494 PARA:
04370 VEGF signaling pathway (2)		K16342 Transcript_1208, Transcript_80584, Transcript_102695, Transcript_102696, Transcript_102697, Transcript_102701, Transcript_102704, Transcript_102705, Transcript_102709, Transcript_102711, Transcript_18711, Transcript_18712, Transcript_18713, Transcript_18715, Transcript_18716, Transcript_18717			K04371 Transcript_14018 K04393 Transcript_69502, Transcript_69503
04371 Apelin signaling pathway (6)		K04688 Transcript_35196, Transcript_35197, Transcript_35198 K06052 Transcript_26497, Transcript_26507 K08341 Transcript_26929			K04371 Transcript_14018	K06052 Transcript_111577, Transcript_111579	K01343 Transcript_111391 K05849 Transcript_65287
04630 JAK-STAT signaling pathway (1)		K04498 Transcript_33840, Transcript_33842, Transcript_95320 K04695 Transcript_90417, Transcript_90423, Transcript_90425 K04696 Transcript_90417, Transcript_90423, Transcript_90425 K04701 Transcript_90417, Transcript_90423, Transcript_90425			K04699 Transcript_3777
04064 NF-kappa B signaling pathway (5)		K03173 Transcript_67632, Transcript_88747, Transcript_101664 K03174 Transcript_57365, Transcript_57367, Transcript_57369, Transcript_57370, Transcript_67632, Transcript_88742, Transcript_88747, Transcript_101664 K03175 Transcript_57365, Transcript_57367, Transcript_57369, Transcript_57370, Transcript_88744, Transcript_88749 K11859 Transcript_77774, Transcript_77777, Transcript_77779			K03173 Transcript_56482, Transcript_56486, Transcript_56487, Transcript_81096, Transcript_81101, Transcript_81102, Transcript_93309, Transcript_101662, Transcript_101665, Transcript_101668, Transcript_101669 K03174 Transcript_56482, Transcript_56486, Transcript_56487, Transcript_69257, Transcript_81096, Transcript_81101, Transcript_81102, Transcript_81103, Transcript_93309, Transcript_101105, Tra…		K03173 Transcript_56483, Transcript_57116 K03174 Transcript_56483, Transcript_57116, Transcript_13821 K03175 Transcript_46240, Transcript_46241, Transcript_68501, Transcript_92993, Transcript_92994, Transcript_92997, Transcript_92998, Transcript_93000, Transcript_93001, Transcript_93003, Transcript_93005, Transcript_93006, Transcript_13821 K09849 Transcript_33239, Transcript_110357 K12646 Transcr…
04668 TNF signaling pathway (3)		K03173 Transcript_67632, Transcript_88747, Transcript_101664 K03174 Transcript_57365, Transcript_57367, Transcript_57369, Transcript_57370, Transcript_67632, Transcript_88742, Transcript_88747, Transcript_101664 K04448 Transcript_10875 K04696 Transcript_90417, Transcript_90423, Transcript_90425 K06052 Transcript_26497, Transcript_26507 K07763 Transcript_93554, Transcript_93556, Transcript_93557, …			K01403 Transcript_56894, Transcript_56902, Transcript_56904 K03173 Transcript_56482, Transcript_56486, Transcript_56487, Transcript_81096, Transcript_81101, Transcript_81102, Transcript_93309, Transcript_101662, Transcript_101665, Transcript_101668, Transcript_101669 K03174 Transcript_56482, Transcript_56486, Transcript_56487, Transcript_69257, Transcript_81096, Transcript_81101, Transcript_81102…	K06052 Transcript_111577, Transcript_111579 K06494 Transcript_149503, Transcript_149504	K03173 Transcript_56483, Transcript_57116 K03174 Transcript_56483, Transcript_57116, Transcript_13821 K09849 Transcript_33239, Transcript_110357
04066 HIF-1 signaling pathway (1)		K04498 Transcript_33840, Transcript_33842, Transcript_95320 K04515 Transcript_29522 K04688 Transcript_35196, Transcript_35197, Transcript_35198			K04371 Transcript_14018 K14736 Transcript_95373		K05087 Transcript_23849, Transcript_23858
04068 FoxO signaling pathway (5)		K01596 Transcript_89004, Transcript_89009 K04498 Transcript_33840, Transcript_33842, Transcript_95320 K08341 Transcript_26929			K04371 Transcript_14018 K05868 Transcript_40128, Transcript_40130 K21770 Transcript_40128, Transcript_40130		K01596 Transcript_99077 K05087 Transcript_23849, Transcript_23858 K05868 Transcript_28189, Transcript_28193, Transcript_28194, Transcript_28196 K21770 Transcript_28189, Transcript_28193, Transcript_28194, Transcript_28196 K21771 Transcript_16693
04020 Calcium signaling pathway (10)		K04137 Transcript_58558 K04515 Transcript_29522		K13755 Transcript_206885	K04266 Transcript_11279		K04150 Transcript_20963 K04160 Transcript_20963 K04194 Transcript_20963 K04223 Transcript_75741, Transcript_20953, Transcript_20963 K04854 Transcript_87710 K05215 Transcript_80068 K05849 Transcript_65287
04070 Phosphatidylinositol signaling system (2)							K01106 Transcript_42813
04072 Phospholipase D signaling pathway (2)		K04513 Transcript_8150 K16342 Transcript_1208, Transcript_80584, Transcript_102695, Transcript_102696, Transcript_102697, Transcript_102701, Transcript_102704, Transcript_102705, Transcript_102709, Transcript_102711, Transcript_18711, Transcript_18712, Transcript_18713, Transcript_18715, Transcript_18716, Transcript_18717			K04371 Transcript_14018 K04513 Transcript_40207, Transcript_40211, Transcript_29196, Transcript_29198, Transcript_29200 K07937 Transcript_21163		K04513 Transcript_61247, Transcript_61249, Transcript_61252, Transcript_61259 K07941 Transcript_24797
04071 Sphingolipid signaling pathway (4)		K03173 Transcript_67632, Transcript_88747, Transcript_101664 K04265 Transcript_66260, Transcript_73523, Transcript_73524, Transcript_6199, Transcript_100147, Transcript_14996, Transcript_14997 K04513 Transcript_8150			K03173 Transcript_56482, Transcript_56486, Transcript_56487, Transcript_81096, Transcript_81101, Transcript_81102, Transcript_93309, Transcript_101662, Transcript_101665, Transcript_101668, Transcript_101669 K04371 Transcript_14018 K04451 Transcript_54056, Transcript_54058, Transcript_54059 K04513 Transcript_40207, Transcript_40211, Transcript_29196, Transcript_29198, Transcript_29200		K03173 Transcript_56483, Transcript_57116 K04513 Transcript_61247, Transcript_61249, Transcript_61252, Transcript_61259
04024 cAMP signaling pathway (6)		K04265 Transcript_66260, Transcript_73523, Transcript_73524, Transcript_6199, Transcript_100147, Transcript_14996, Transcript_14997 K04448 Transcript_10875 K04498 Transcript_33840, Transcript_33842, Transcript_95320 K04513 Transcript_8150 K04515 Transcript_29522		K06269 Transcript_70303	K04266 Transcript_11279 K04371 Transcript_14018 K04513 Transcript_40207, Transcript_40211, Transcript_29196, Transcript_29198, Transcript_29200 K04615 Transcript_49843, Transcript_130335, Transcript_131772	K05673 Transcript_216922, Transcript_217927, Transcript_285300 K06225 Transcript_46440	K04160 Transcript_20963 K04218 Transcript_20963 K04249 Transcript_57852 K04513 Transcript_61247, Transcript_61249, Transcript_61252, Transcript_61259 K12755 Transcript_11861, Transcript_11862	K06225 CALLO: Transcript_80713 PARA: Transcript_46440	K06225 CALLO: Transcript_80713 PARA: Transcript_46440
04022 cGMP-PKG signaling pathway (6)		Transcript_104007		K06269 Transcript_70303	K04371 Transcript_14018 K04513 Transcript_40207, Transcript_40211, Transcript_29196, Transcript_29198, Transcript_29200		K04513 Transcript_61247, Transcript_61249, Transcript_61252, Transcript_61259 K05849 Transcript_65287 K12755 Transcript_11861, Transcript_11862
04151 PI3K-Akt signaling pathway (7)		K01596 Transcript_89004, Transcript_89009 K04358 Transcript_13410 K04659 Transcript_67970, Transcript_67972, Transcript_67973, Transcript_67974 K04688 Transcript_35196, Transcript_35197, Transcript_35198 K06236 Transcript_39312, Transcript_56009, Transcript_71746 K06238 Transcript_43318, Transcript_43325, Transcript_43328, Transcript_16465, Transcript_16466 K19719 Transcript_39312, Transcript_560…			K04362 Transcript_65527, Transcript_65528 K04371 Transcript_14018 K04451 Transcript_54056, Transcript_54058, Transcript_54059 K05093 Transcript_65527, Transcript_65528, Transcript_13458 K05094 Transcript_65527, Transcript_65528, Transcript_13458 K05095 Transcript_65528 K05636 Transcript_7133 K06252 Transcript_89720	K04362 Transcript_175758, Transcript_175759, Transcript_175763, Transcript_175771 K05093 Transcript_175758, Transcript_175759, Transcript_175763, Transcript_175771 K05094 Transcript_175758, Transcript_175759, Transcript_175763, Transcript_175771 K05095 Transcript_175758, Transcript_175759, Transcript_175763, Transcript_175771 K05635 Transcript_89483 K06247 Transcript_89483	K01596 Transcript_99077 K05087 Transcript_23849, Transcript_23858 K06236 Transcript_71756, Transcript_71764, Transcript_71768 K06238 Transcript_16532, Transcript_17234 K06252 Transcript_12758 K12230 Transcript_84991	K04362 CALLO: Transcript_82227 PARA: Transcript_175758, Transcript_175759, Transcript_175763, Transcript_175771 K05093 CALLO: Transcript_82227 PARA: Transcript_175758, Transcript_175759, Transcript_175763, Transcript_175771 K05094 CALLO: Transcript_82227 PARA: Transcript_175758, Transcript_175759, Transcript_175763, Transcript_175771 K05095 CALLO: Transcript_82227 PARA: Transcript_175758, Transcr…	K04362 CALLO: Transcript_82227 PARA: Transcript_175758, Transcript_175759, Transcript_175763, Transcript_175771 K05093 CALLO: Transcript_82227 PARA: Transcript_175758, Transcript_175759, Transcript_175763, Transcript_175771 K05094 CALLO: Transcript_82227 PARA: Transcript_175758, Transcript_175759, Transcript_175763, Transcript_175771 K05095 CALLO: Transcript_82227 PARA: Transcript_175758, Transcr…
04152 AMPK signaling pathway (4)		K01596 Transcript_89004, Transcript_89009 K04688 Transcript_35196, Transcript_35197, Transcript_35198					K01596 Transcript_99077 K05087 Transcript_23849, Transcript_23858 K06627 Transcript_104007, Transcript_104010, Transcript_104014, Transcript_104015 K07359 Transcript_80068
04150 mTOR signaling pathway (4)		K03068 Transcript_88815 K03209 Transcript_15019, Transcript_29256 K04513 Transcript_8150 K04688 Transcript_35196, Transcript_35197, Transcript_35198			K03068 Transcript_88806, Transcript_88807, Transcript_88810, Transcript_88814, Transcript_88816 K04371 Transcript_14018 K04513 Transcript_40207, Transcript_40211, Transcript_29196, Transcript_29198, Transcript_29200	K02432 Transcript_179998	K00445 Transcript_12306 K02432 Transcript_22238 K04513 Transcript_61247, Transcript_61249, Transcript_61252, Transcript_61259 K05087 Transcript_23849, Transcript_23858
Signaling molecules and interaction
04080 Neuroactive ligand-receptor interaction (17)		K01312 Transcript_56401, Transcript_121631 K04137 Transcript_58558 K04203 Transcript_29762 K04265 Transcript_66260, Transcript_73523, Transcript_73524, Transcript_6199, Transcript_100147, Transcript_14996, Transcript_14997			K01315 Transcript_58602 K04203 Transcript_55896, Transcript_55903 K04266 Transcript_11279 K04615 Transcript_49843, Transcript_130335, Transcript_131772 K05193 Transcript_31454 K05194 Transcript_31454 K05195 Transcript_31454		K04150 Transcript_20963 K04160 Transcript_20963 K04194 Transcript_20963 K04210 Transcript_20963 K04215 Transcript_20963 K04218 Transcript_20963 K04223 Transcript_75741, Transcript_20953, Transcript_20963 K04230 Transcript_20963 K04231 Transcript_20963 K04240 Transcript_48460 K04249 Transcript_57852 K04306 Transcript_79144 K04307 Transcript_79144 K04577 Transcript_41747 K04810 Transcript_120623 K0…
04512 ECM-receptor interaction (4)		K04659 Transcript_67970, Transcript_67972, Transcript_67973, Transcript_67974 K06236 Transcript_39312, Transcript_56009, Transcript_71746 K06238 Transcript_43318, Transcript_43325, Transcript_43328, Transcript_16465, Transcript_16466 K06254 Transcript_50842, Transcript_50843, Transcript_50844, Transcript_50846 K19719 Transcript_39312, Transcript_56009, Transcript_27296			K05636 Transcript_7133 K06252 Transcript_89720	K05635 Transcript_89483 K06247 Transcript_89483	K06236 Transcript_71756, Transcript_71764, Transcript_71768 K06238 Transcript_16532, Transcript_17234 K06252 Transcript_12758 K06267 Transcript_60515
04060 Cytokine-cytokine receptor interaction (1)						K16620 Transcript_39062, Transcript_39064		K04663 CALLO: Transcript_52494 PARA: K16620 CALLO: Transcript_52494 PARA: Transcript_39062, Transcript_39064 K16621 CALLO: Transcript_52494 PARA:	K04663 CALLO: Transcript_52494 PARA: K16620 CALLO: Transcript_52494 PARA: Transcript_39062, Transcript_39064 K16621 CALLO: Transcript_52494 PARA:
04514 Cell adhesion molecules (CAMs) (3)						K06494 Transcript_149503, Transcript_149504 K06495 Transcript_149503, Transcript_149504 K06496 Transcript_149503, Transcript_149504	K05693 Transcript_60621 K05695 Transcript_60620 K06496 Transcript_16532
Cellular Processes
Transport and catabolism
04144 Endocytosis (7)		K03175 Transcript_57365, Transcript_57367, Transcript_57369, Transcript_57370, Transcript_88744, Transcript_88749 K03283 Transcript_113779, Transcript_15689, Transcript_15690 K04513 Transcript_8150 K06093 Transcript_99822, Transcript_99827 K12486 Transcript_43662, Transcript_43664			K04393 Transcript_69502, Transcript_69503 K04513 Transcript_40207, Transcript_40211, Transcript_29196, Transcript_29198, Transcript_29200 K05093 Transcript_65527, Transcript_65528, Transcript_13458 K05094 Transcript_65527, Transcript_65528, Transcript_13458 K05095 Transcript_65528 K07937 Transcript_21163 K11981 Transcript_103588, Transcript_108964 K12197 Transcript_66571	K05093 Transcript_175758, Transcript_175759, Transcript_175763, Transcript_175771 K05094 Transcript_175758, Transcript_175759, Transcript_175763, Transcript_175771 K05095 Transcript_175758, Transcript_175759, Transcript_175763, Transcript_175771	K03175 Transcript_46240, Transcript_46241, Transcript_68501, Transcript_92993, Transcript_92994, Transcript_92997, Transcript_92998, Transcript_93000, Transcript_93001, Transcript_93003, Transcript_93005, Transcript_93006, Transcript_13821 K04513 Transcript_61247, Transcript_61249, Transcript_61252, Transcript_61259 K05087 Transcript_23849, Transcript_23858 K06069 Transcript_103342 K07941 Transcr…	K05093 CALLO: Transcript_82227 PARA: Transcript_175758, Transcript_175759, Transcript_175763, Transcript_175771 K05094 CALLO: Transcript_82227 PARA: Transcript_175758, Transcript_175759, Transcript_175763, Transcript_175771 K05095 CALLO: Transcript_82227 PARA: Transcript_175758, Transcript_175759, Transcript_175763, Transcript_175771	K05093 CALLO: Transcript_82227 PARA: Transcript_175758, Transcript_175759, Transcript_175763, Transcript_175771 K05094 CALLO: Transcript_82227 PARA: Transcript_175758, Transcript_175759, Transcript_175763, Transcript_175771 K05095 CALLO: Transcript_82227 PARA: Transcript_175758, Transcript_175759, Transcript_175763, Transcript_175771
04145 Phagosome (3)		K01365 Transcript_102155, Transcript_129893, Transcript_28861 K04659 Transcript_67970, Transcript_67972, Transcript_67973, Transcript_67974 K06560 Transcript_86558, Transcript_86559 K07374 Transcript_90287			K07375 Transcript_4587, Transcript_127097, Transcript_132105, Transcript_132515		K05692 Transcript_70692, Transcript_70693, Transcript_70698, Transcript_85504
04142 Lysosome (4)		K01135 Transcript_17503 K01365 Transcript_102155, Transcript_129893, Transcript_28861 K06497 Transcript_35944, Transcript_35945, Transcript_35946, Transcript_35947, Transcript_35948, Transcript_35949, Transcript_35950			K14379 Transcript_117409	K01195 Transcript_262316, Transcript_262317, Transcript_262325, Transcript_262326	K01373 Transcript_60440, Transcript_60442 K01444 Transcript_93193, Transcript_93199, Transcript_93201, Transcript_93203, Transcript_93205, Transcript_93206, Transcript_93211, Transcript_93212 K12392 Transcript_86689, Transcript_86692 K12396 Transcript_53692
04146 Peroxisome (3)							K05675 Transcript_47940, Transcript_47947, Transcript_47953 K05676 Transcript_47940, Transcript_47947, Transcript_47953 K17879 Transcript_72785
04140 Autophagy - animal (5)		K01365 Transcript_102155, Transcript_129893, Transcript_28861 K03175 Transcript_57365, Transcript_57367, Transcript_57369, Transcript_57370, Transcript_88744, Transcript_88749 K04688 Transcript_35196, Transcript_35197, Transcript_35198 K08341 Transcript_26929 K08860 Transcript_109440			K04371 Transcript_14018 K08342 Transcript_14906 K14381 Transcript_66082		K03175 Transcript_46240, Transcript_46241, Transcript_68501, Transcript_92993, Transcript_92994, Transcript_92997, Transcript_92998, Transcript_93000, Transcript_93001, Transcript_93003, Transcript_93005, Transcript_93006, Transcript_13821 K05087 Transcript_23849, Transcript_23858 K07359 Transcript_80068 K21245 Transcript_22588, Transcript_22591	K08852 CALLO: Transcript_94921 PARA:	K08852 CALLO: Transcript_94921 PARA:
04137 Mitophagy - animal (2)		K04448 Transcript_10875 K08341 Transcript_26929 K08860 Transcript_109440			K04451 Transcript_54056, Transcript_54058, Transcript_54059 K14381 Transcript_66082
Cell growth and death
04110 Cell cycle (9)		K04498 Transcript_33840, Transcript_33842, Transcript_95320 K13728 Transcript_95989			K04451 Transcript_54056, Transcript_54058, Transcript_54059 K05868 Transcript_40128, Transcript_40130 K21770 Transcript_40128, Transcript_40130		K02087 Transcript_29060, Transcript_29061, Transcript_29062 K02541 Transcript_33255 K02604 Transcript_15654, Transcript_15655, Transcript_15656, Transcript_15657 K02608 Transcript_24716, Transcript_24717 K03357 Transcript_13430 K05868 Transcript_28189, Transcript_28193, Transcript_28194, Transcript_28196 K06627 Transcript_104007, Transcript_104010, Transcript_104014, Transcript_104015 K21770 Tran…
04114 Oocyte meiosis (9)		K04515 Transcript_29522 K13728 Transcript_95989		K06269 Transcript_70303	K04367 Transcript_18777 K04371 Transcript_14018 K05868 Transcript_40128, Transcript_40130 K21770 Transcript_40128, Transcript_40130		K02087 Transcript_29060, Transcript_29061, Transcript_29062 K03357 Transcript_13430 K05087 Transcript_23849, Transcript_23858 K05868 Transcript_28189, Transcript_28193, Transcript_28194, Transcript_28196 K08836 Transcript_65625 K10292 Transcript_34722 K10318 Transcript_34722 K21770 Transcript_28189, Transcript_28193, Transcript_28194, Transcript_28196
04210 Apoptosis (5)		K01365 Transcript_102155, Transcript_129893, Transcript_28861 K03173 Transcript_67632, Transcript_88747, Transcript_101664 K04448 Transcript_10875 K07374 Transcript_90287 K08860 Transcript_109440			K03173 Transcript_56482, Transcript_56486, Transcript_56487, Transcript_81096, Transcript_81101, Transcript_81102, Transcript_93309, Transcript_101662, Transcript_101665, Transcript_101668, Transcript_101669 K04371 Transcript_14018 K04451 Transcript_54056, Transcript_54058, Transcript_54059	K10798 Transcript_262170, Transcript_262178	K01373 Transcript_60440, Transcript_60442 K03173 Transcript_56483, Transcript_57116 K05692 Transcript_70692, Transcript_70693, Transcript_70698, Transcript_85504	K08852 CALLO: Transcript_94921 PARA:	K08852 CALLO: Transcript_94921 PARA:
04216 Ferroptosis (1)					K04451 Transcript_54056, Transcript_54058, Transcript_54059 K14736 Transcript_95373		K10142 Transcript_88283, Transcript_88287, Transcript_88288
04217 Necroptosis (4)		K03173 Transcript_67632, Transcript_88747, Transcript_101664 K04515 Transcript_29522 K11859 Transcript_77774, Transcript_77777, Transcript_77779 K16342 Transcript_1208, Transcript_80584, Transcript_102695, Transcript_102696, Transcript_102697, Transcript_102701, Transcript_102704, Transcript_102705, Transcript_102709, Transcript_102711, Transcript_18711, Transcript_18712, Transcript_18713, Transc…			K03173 Transcript_56482, Transcript_56486, Transcript_56487, Transcript_81096, Transcript_81101, Transcript_81102, Transcript_93309, Transcript_101662, Transcript_101665, Transcript_101668, Transcript_101669 K05401 Transcript_44018 K09849 Transcript_110355 K12197 Transcript_66571 K14381 Transcript_66082 K17065 Transcript_106715, Transcript_106718 K20703 Transcript_81344		K03173 Transcript_56483, Transcript_57116 K09849 Transcript_33239, Transcript_110357 K11251 Transcript_11699
04115 p53 signaling pathway (5)					K04451 Transcript_54056, Transcript_54058, Transcript_54059 K05868 Transcript_40128, Transcript_40130 K10148 Transcript_54056, Transcript_54058, Transcript_54059 K21770 Transcript_40128, Transcript_40130		K02087 Transcript_29060, Transcript_29061, Transcript_29062 K05868 Transcript_28189, Transcript_28193, Transcript_28194, Transcript_28196 K10142 Transcript_88283, Transcript_88287, Transcript_88288 K10143 Transcript_73588 K21770 Transcript_28189, Transcript_28193, Transcript_28194, Transcript_28196
04218 Cellular senescence (6)		K02678 Transcript_86101, Transcript_86102		K06269 Transcript_70303	K04371 Transcript_14018 K04451 Transcript_54056, Transcript_54058, Transcript_54059 K05868 Transcript_40128, Transcript_40130 K14381 Transcript_66082 K21770 Transcript_40128, Transcript_40130		K02087 Transcript_29060, Transcript_29061, Transcript_29062 K05868 Transcript_28189, Transcript_28193, Transcript_28194, Transcript_28196 K06627 Transcript_104007, Transcript_104010, Transcript_104014, Transcript_104015 K21770 Transcript_28189, Transcript_28193, Transcript_28194, Transcript_28196 K21771 Transcript_16693
Cellular community - eukaryotes
04510 Focal adhesion (9)		K04448 Transcript_10875 K04513 Transcript_8150 K04659 Transcript_67970, Transcript_67972, Transcript_67973, Transcript_67974 K06236 Transcript_39312, Transcript_56009, Transcript_71746 K06238 Transcript_43318, Transcript_43325, Transcript_43328, Transcript_16465, Transcript_16466 K19719 Transcript_39312, Transcript_56009, Transcript_27296		K05699 Transcript_163509, Transcript_163514 K06269 Transcript_70303	K04371 Transcript_14018 K04393 Transcript_69502, Transcript_69503 K04513 Transcript_40207, Transcript_40211, Transcript_29196, Transcript_29198, Transcript_29200 K05636 Transcript_7133 K06252 Transcript_89720	K05635 Transcript_89483 K06247 Transcript_89483	K04437 Transcript_96975 K04513 Transcript_61247, Transcript_61249, Transcript_61252, Transcript_61259 K05087 Transcript_23849, Transcript_23858 K05692 Transcript_70692, Transcript_70693, Transcript_70698, Transcript_85504 K06236 Transcript_71756, Transcript_71764, Transcript_71768 K06238 Transcript_16532, Transcript_17234 K06252 Transcript_12758 K12755 Transcript_11861, Transcript_11862 K12757 Tr…
04520 Adherens junction (6)		K04498 Transcript_33840, Transcript_33842, Transcript_95320 K04513 Transcript_8150 K08889 Transcript_28016, Transcript_28018		K05699 Transcript_163509, Transcript_163514	K04362 Transcript_65527, Transcript_65528 K04371 Transcript_14018 K04393 Transcript_69502, Transcript_69503 K04513 Transcript_40207, Transcript_40211, Transcript_29196, Transcript_29198, Transcript_29200	K04362 Transcript_175758, Transcript_175759, Transcript_175763, Transcript_175771	K04513 Transcript_61247, Transcript_61249, Transcript_61252, Transcript_61259 K05087 Transcript_23849, Transcript_23858 K05627 Transcript_44812, Transcript_44814 K05692 Transcript_70692, Transcript_70693, Transcript_70698, Transcript_85504 K05693 Transcript_60621 K05695 Transcript_60620	K04362 CALLO: Transcript_82227 PARA: Transcript_175758, Transcript_175759, Transcript_175763, Transcript_175771	K04362 CALLO: Transcript_82227 PARA: Transcript_175758, Transcript_175759, Transcript_175763, Transcript_175771
04530 Tight junction (6)		K04448 Transcript_10875 K04513 Transcript_8150 K06093 Transcript_99822, Transcript_99827 K07374 Transcript_90287 K08367 Transcript_92319, Transcript_92326, Transcript_92329, Transcript_92333		K05699 Transcript_163509, Transcript_163514	K04393 Transcript_69502, Transcript_69503 K04513 Transcript_40207, Transcript_40211, Transcript_29196, Transcript_29198, Transcript_29200 K07902 Transcript_56327		K04513 Transcript_61247, Transcript_61249, Transcript_61252, Transcript_61259 K05692 Transcript_70692, Transcript_70693, Transcript_70698, Transcript_85504 K06069 Transcript_103342 K12755 Transcript_11861, Transcript_11862 K12757 Transcript_11861, Transcript_11862
04540 Gap junction (7)		K07374 Transcript_90287			K04371 Transcript_14018 K07375 Transcript_4587, Transcript_127097, Transcript_132105, Transcript_132515		K02087 Transcript_29060, Transcript_29061, Transcript_29062 K04420 Transcript_41816, Transcript_41819, Transcript_108837, Transcript_108844, Transcript_108846, Transcript_108850, Transcript_108852
04550 Signaling pathways regulating pluripotency of stem cells (3)		K03209 Transcript_15019, Transcript_29256 K09326 Transcript_61799, Transcript_61804, Transcript_61805			K04362 Transcript_65527, Transcript_65528 K04371 Transcript_14018 K05093 Transcript_65527, Transcript_65528, Transcript_13458 K05094 Transcript_65527, Transcript_65528, Transcript_13458 K05095 Transcript_65528 K11488 Transcript_108147 K16796 Transcript_2935 K18489 Transcript_9910	K02432 Transcript_179998 K04362 Transcript_175758, Transcript_175759, Transcript_175763, Transcript_175771 K05093 Transcript_175758, Transcript_175759, Transcript_175763, Transcript_175771 K05094 Transcript_175758, Transcript_175759, Transcript_175763, Transcript_175771 K05095 Transcript_175758, Transcript_175759, Transcript_175763, Transcript_175771	K00445 Transcript_12306 K02432 Transcript_22238 K05087 Transcript_23849, Transcript_23858	K04362 CALLO: Transcript_82227 PARA: Transcript_175758, Transcript_175759, Transcript_175763, Transcript_175771 K05093 CALLO: Transcript_82227 PARA: Transcript_175758, Transcript_175759, Transcript_175763, Transcript_175771 K05094 CALLO: Transcript_82227 PARA: Transcript_175758, Transcript_175759, Transcript_175763, Transcript_175771 K05095 CALLO: Transcript_82227 PARA: Transcript_175758, Transcr…	K04362 CALLO: Transcript_82227 PARA: Transcript_175758, Transcript_175759, Transcript_175763, Transcript_175771 K05093 CALLO: Transcript_82227 PARA: Transcript_175758, Transcript_175759, Transcript_175763, Transcript_175771 K05094 CALLO: Transcript_82227 PARA: Transcript_175758, Transcript_175759, Transcript_175763, Transcript_175771 K05095 CALLO: Transcript_82227 PARA: Transcript_175758, Transcr…
Cellular community - prokaryotes
02025 Biofilm formation - Pseudomonas aeruginosa (1)					K01768 Transcript_46201, Transcript_46202, Transcript_46214, Transcript_46221
02024 Quorum sensing (1)							K03106 Transcript_43656
Cell motility
04810 Regulation of actin cytoskeleton (5)		K04358 Transcript_13410 K04513 Transcript_8150		K05699 Transcript_163509, Transcript_163514 K06269 Transcript_70303	K04362 Transcript_65527, Transcript_65528 K04367 Transcript_18777 K04371 Transcript_14018 K04393 Transcript_69502, Transcript_69503 K04513 Transcript_40207, Transcript_40211, Transcript_29196, Transcript_29198, Transcript_29200 K05093 Transcript_65527, Transcript_65528, Transcript_13458 K05094 Transcript_65527, Transcript_65528, Transcript_13458 K05095 Transcript_65528	K04362 Transcript_175758, Transcript_175759, Transcript_175763, Transcript_175771 K05093 Transcript_175758, Transcript_175759, Transcript_175763, Transcript_175771 K05094 Transcript_175758, Transcript_175759, Transcript_175763, Transcript_175771 K05095 Transcript_175758, Transcript_175759, Transcript_175763, Transcript_175771	K04513 Transcript_61247, Transcript_61249, Transcript_61252, Transcript_61259 K05627 Transcript_44812, Transcript_44814 K05692 Transcript_70692, Transcript_70693, Transcript_70698, Transcript_85504 K12755 Transcript_11861, Transcript_11862 K12757 Transcript_11861, Transcript_11862	K04362 CALLO: Transcript_82227 PARA: Transcript_175758, Transcript_175759, Transcript_175763, Transcript_175771 K05093 CALLO: Transcript_82227 PARA: Transcript_175758, Transcript_175759, Transcript_175763, Transcript_175771 K05094 CALLO: Transcript_82227 PARA: Transcript_175758, Transcript_175759, Transcript_175763, Transcript_175771 K05095 CALLO: Transcript_82227 PARA: Transcript_175758, Transcr…	K04362 CALLO: Transcript_82227 PARA: Transcript_175758, Transcript_175759, Transcript_175763, Transcript_175771 K05093 CALLO: Transcript_82227 PARA: Transcript_175758, Transcript_175759, Transcript_175763, Transcript_175771 K05094 CALLO: Transcript_82227 PARA: Transcript_175758, Transcript_175759, Transcript_175763, Transcript_175771 K05095 CALLO: Transcript_82227 PARA: Transcript_175758, Transcr…
Organismal Systems
Immune system
04640 Hematopoietic cell lineage (1)							K11140 Transcript_53129, Transcript_53131, Transcript_53132, Transcript_53133, Transcript_53134
04610 Complement and coagulation cascades (1)		K01324 Transcript_56401, Transcript_121631 K03899 Transcript_41530 K03910 Transcript_100737, Transcript_100739, Transcript_100741, Transcript_100743, Transcript_100744, Transcript_100747, Transcript_100749, Transcript_14845			K01315 Transcript_58602		K01343 Transcript_111391
04611 Platelet activation (10)		K04513 Transcript_8150 K06236 Transcript_39312, Transcript_56009, Transcript_71746 K16342 Transcript_1208, Transcript_80584, Transcript_102695, Transcript_102696, Transcript_102697, Transcript_102701, Transcript_102704, Transcript_102705, Transcript_102709, Transcript_102711, Transcript_18711, Transcript_18712, Transcript_18713, Transcript_18715, Transcript_18716, Transcript_18717 K19720 Transcri…		K06269 Transcript_70303	K04371 Transcript_14018 K04513 Transcript_40207, Transcript_40211, Transcript_29196, Transcript_29198, Transcript_29200		K04513 Transcript_61247, Transcript_61249, Transcript_61252, Transcript_61259 K05215 Transcript_80068 K05692 Transcript_70692, Transcript_70693, Transcript_70698, Transcript_85504 K06069 Transcript_103342 K06236 Transcript_71756, Transcript_71764, Transcript_71768 K12757 Transcript_11861, Transcript_11862 K19720 Transcript_71756, Transcript_71764, Transcript_71768
04620 Toll-like receptor signaling pathway (2)		K03174 Transcript_57365, Transcript_57367, Transcript_57369, Transcript_57370, Transcript_67632, Transcript_88742, Transcript_88747, Transcript_101664 K03175 Transcript_57365, Transcript_57367, Transcript_57369, Transcript_57370, Transcript_88744, Transcript_88749 K04448 Transcript_10875			K03174 Transcript_56482, Transcript_56486, Transcript_56487, Transcript_69257, Transcript_81096, Transcript_81101, Transcript_81102, Transcript_81103, Transcript_93309, Transcript_101105, Transcript_101662, Transcript_101665, Transcript_101668, Transcript_101669 K04371 Transcript_14018 K05401 Transcript_44018		K03174 Transcript_56483, Transcript_57116, Transcript_13821 K03175 Transcript_46240, Transcript_46241, Transcript_68501, Transcript_92993, Transcript_92994, Transcript_92997, Transcript_92998, Transcript_93000, Transcript_93001, Transcript_93003, Transcript_93005, Transcript_93006, Transcript_13821
04624 Toll and Imd signaling pathway (1)		K04448 Transcript_10875			K20703 Transcript_81344		K20674 Transcript_57855
04621 NOD-like receptor signaling pathway (6)		K03173 Transcript_67632, Transcript_88747, Transcript_101664 K03174 Transcript_57365, Transcript_57367, Transcript_57369, Transcript_57370, Transcript_67632, Transcript_88742, Transcript_88747, Transcript_101664 K03175 Transcript_57365, Transcript_57367, Transcript_57369, Transcript_57370, Transcript_88744, Transcript_88749 K04448 Transcript_10875 K04513 Transcript_8150 K04612 Transcript_71194, T…			K03173 Transcript_56482, Transcript_56486, Transcript_56487, Transcript_81096, Transcript_81101, Transcript_81102, Transcript_93309, Transcript_101662, Transcript_101665, Transcript_101668, Transcript_101669 K03174 Transcript_56482, Transcript_56486, Transcript_56487, Transcript_69257, Transcript_81096, Transcript_81101, Transcript_81102, Transcript_81103, Transcript_93309, Transcript_101105, Tra…		K03173 Transcript_56483, Transcript_57116 K03174 Transcript_56483, Transcript_57116, Transcript_13821 K03175 Transcript_46240, Transcript_46241, Transcript_68501, Transcript_92993, Transcript_92994, Transcript_92997, Transcript_92998, Transcript_93000, Transcript_93001, Transcript_93003, Transcript_93005, Transcript_93006, Transcript_13821 K04513 Transcript_61247, Transcript_61249, Transcript_612…
04622 RIG-I-like receptor signaling pathway (5)		K03173 Transcript_67632, Transcript_88747, Transcript_101664 K03174 Transcript_57365, Transcript_57367, Transcript_57369, Transcript_57370, Transcript_67632, Transcript_88742, Transcript_88747, Transcript_101664 K03175 Transcript_57365, Transcript_57367, Transcript_57369, Transcript_57370, Transcript_88744, Transcript_88749			K03173 Transcript_56482, Transcript_56486, Transcript_56487, Transcript_81096, Transcript_81101, Transcript_81102, Transcript_93309, Transcript_101662, Transcript_101665, Transcript_101668, Transcript_101669 K03174 Transcript_56482, Transcript_56486, Transcript_56487, Transcript_69257, Transcript_81096, Transcript_81101, Transcript_81102, Transcript_81103, Transcript_93309, Transcript_101105, Tra…		K03173 Transcript_56483, Transcript_57116 K03174 Transcript_56483, Transcript_57116, Transcript_13821 K03175 Transcript_46240, Transcript_46241, Transcript_68501, Transcript_92993, Transcript_92994, Transcript_92997, Transcript_92998, Transcript_93000, Transcript_93001, Transcript_93003, Transcript_93005, Transcript_93006, Transcript_13821 K12646 Transcript_96360, Transcript_96361, Transcript_963…
04623 Cytosolic DNA-sensing pathway (1)					K14721 Transcript_63782, Transcript_63783		K12646 Transcript_96360, Transcript_96361, Transcript_96362, Transcript_96369
04625 C-type lectin receptor signaling pathway (2)		K04448 Transcript_10875 K04513 Transcript_8150			K04371 Transcript_14018 K04513 Transcript_40207, Transcript_40211, Transcript_29196, Transcript_29198, Transcript_29200 K09444 Transcript_9190		K04513 Transcript_61247, Transcript_61249, Transcript_61252, Transcript_61259
04612 Antigen processing and presentation (2)		K01365 Transcript_102155, Transcript_129893, Transcript_28861 K03283 Transcript_113779, Transcript_15689, Transcript_15690
04650 Natural killer cell mediated cytotoxicity (1)					K04371 Transcript_14018
04660 T cell receptor signaling pathway (1)		K04448 Transcript_10875 K04513 Transcript_8150			K04371 Transcript_14018 K04393 Transcript_69502, Transcript_69503 K04513 Transcript_40207, Transcript_40211, Transcript_29196, Transcript_29198, Transcript_29200		K04513 Transcript_61247, Transcript_61249, Transcript_61252, Transcript_61259
04658 Th1 and Th2 cell differentiation (1)		K02599 Transcript_64029, Transcript_64041, Transcript_26495 K04448 Transcript_10875 K06051 Transcript_26509 K06052 Transcript_26497, Transcript_26507 K09279 Transcript_92333			K02599 Transcript_82624, Transcript_82635, Transcript_9782 K04371 Transcript_14018	K06052 Transcript_111577, Transcript_111579 K21635 Transcript_111577, Transcript_111579	K02599 Transcript_96975
04659 Th17 cell differentiation (1)		K04448 Transcript_10875 K08367 Transcript_92319, Transcript_92326, Transcript_92329, Transcript_92333 K09445 Transcript_76488, Transcript_76491, Transcript_76492			K04371 Transcript_14018
04657 IL-17 signaling pathway (5)		K03173 Transcript_67632, Transcript_88747, Transcript_101664 K03174 Transcript_57365, Transcript_57367, Transcript_57369, Transcript_57370, Transcript_67632, Transcript_88742, Transcript_88747, Transcript_101664 K03175 Transcript_57365, Transcript_57367, Transcript_57369, Transcript_57370, Transcript_88744, Transcript_88749 K04448 Transcript_10875 K04449 Transcript_10875 K06855 Transcript_31121, …			K01403 Transcript_56894, Transcript_56902, Transcript_56904 K03173 Transcript_56482, Transcript_56486, Transcript_56487, Transcript_81096, Transcript_81101, Transcript_81102, Transcript_93309, Transcript_101662, Transcript_101665, Transcript_101668, Transcript_101669 K03174 Transcript_56482, Transcript_56486, Transcript_56487, Transcript_69257, Transcript_81096, Transcript_81101, Transcript_81102…		K03173 Transcript_56483, Transcript_57116 K03174 Transcript_56483, Transcript_57116, Transcript_13821 K03175 Transcript_46240, Transcript_46241, Transcript_68501, Transcript_92993, Transcript_92994, Transcript_92997, Transcript_92998, Transcript_93000, Transcript_93001, Transcript_93003, Transcript_93005, Transcript_93006, Transcript_13821 K09848 Transcript_13821 K09849 Transcript_33239, Transcri…
04662 B cell receptor signaling pathway (1)		K04448 Transcript_10875			K04371 Transcript_14018		K12230 Transcript_84991
04664 Fc epsilon RI signaling pathway (1)		K00461 Transcript_60732, Transcript_60735, Transcript_60739 K16342 Transcript_1208, Transcript_80584, Transcript_102695, Transcript_102696, Transcript_102697, Transcript_102701, Transcript_102704, Transcript_102705, Transcript_102709, Transcript_102711, Transcript_18711, Transcript_18712, Transcript_18713, Transcript_18715, Transcript_18716, Transcript_18717			K04371 Transcript_14018
04666 Fc gamma R-mediated phagocytosis (1)		K04688 Transcript_35196, Transcript_35197, Transcript_35198 K16342 Transcript_1208, Transcript_80584, Transcript_102695, Transcript_102696, Transcript_102697, Transcript_102701, Transcript_102704, Transcript_102705, Transcript_102709, Transcript_102711, Transcript_18711, Transcript_18712, Transcript_18713, Transcript_18715, Transcript_18716, Transcript_18717			K04371 Transcript_14018 K04393 Transcript_69502, Transcript_69503		K07941 Transcript_24797
04670 Leukocyte transendothelial migration (5)		K04513 Transcript_8150		K05699 Transcript_163509, Transcript_163514	K01403 Transcript_56894, Transcript_56902, Transcript_56904 K04393 Transcript_69502, Transcript_69503 K04513 Transcript_40207, Transcript_40211, Transcript_29196, Transcript_29198, Transcript_29200		K04513 Transcript_61247, Transcript_61249, Transcript_61252, Transcript_61259 K05692 Transcript_70692, Transcript_70693, Transcript_70698, Transcript_85504 K12755 Transcript_11861, Transcript_11862 K12757 Transcript_11861, Transcript_11862
04062 Chemokine signaling pathway (3)		K04513 Transcript_8150			K04371 Transcript_14018 K04393 Transcript_69502, Transcript_69503 K04513 Transcript_40207, Transcript_40211, Transcript_29196, Transcript_29198, Transcript_29200		K04513 Transcript_61247, Transcript_61249, Transcript_61252, Transcript_61259
Endocrine system
04911 Insulin secretion (2)		K04515 Transcript_29522					K04194 Transcript_20963
04910 Insulin signaling pathway (3)		K01596 Transcript_89004, Transcript_89009 K04688 Transcript_35196, Transcript_35197, Transcript_35198 K04695 Transcript_90417, Transcript_90423, Transcript_90425 K04696 Transcript_90417, Transcript_90423, Transcript_90425 K07189 Transcript_45729, Transcript_15384		K06269 Transcript_70303	K04371 Transcript_14018 K07194 Transcript_69502, Transcript_69503		K01106 Transcript_42813 K01596 Transcript_99077 K05695 Transcript_60620 K06069 Transcript_103342
04922 Glucagon signaling pathway (3)		K01596 Transcript_89004, Transcript_89009 K04498 Transcript_33840, Transcript_33842, Transcript_95320 K04515 Transcript_29522 K16311 Transcript_27285, Transcript_27286, Transcript_27287, Transcript_27288, Transcript_27289, Transcript_27290, Transcript_27292 K19008 Transcript_27285, Transcript_27286, Transcript_27287, Transcript_27289, Transcript_27290, Transcript_27292					K01596 Transcript_99077
04923 Regulation of lipolysis in adipocytes (2)		K04265 Transcript_66260, Transcript_73523, Transcript_73524, Transcript_6199, Transcript_100147, Transcript_14996, Transcript_14997					K04249 Transcript_57852
04920 Adipocytokine signaling pathway (3)		K01596 Transcript_89004, Transcript_89009 K03173 Transcript_67632, Transcript_88747, Transcript_101664 K04696 Transcript_90417, Transcript_90423, Transcript_90425			K03173 Transcript_56482, Transcript_56486, Transcript_56487, Transcript_81096, Transcript_81101, Transcript_81102, Transcript_93309, Transcript_101662, Transcript_101665, Transcript_101668, Transcript_101669		K01596 Transcript_99077 K03173 Transcript_56483, Transcript_57116 K07359 Transcript_80068
03320 PPAR signaling pathway (1)		K01596 Transcript_89004, Transcript_89009					K01596 Transcript_99077
04929 GnRH secretion (3)					K04371 Transcript_14018 K04615 Transcript_49843, Transcript_130335, Transcript_131772		K04854 Transcript_87710
04912 GnRH signaling pathway (4)		K04448 Transcript_10875 K04515 Transcript_29522 K07763 Transcript_93554, Transcript_93556, Transcript_93557, Transcript_104281, Transcript_104282, Transcript_104283, Transcript_104284, Transcript_104285, Transcript_104286, Transcript_29472 K16342 Transcript_1208, Transcript_80584, Transcript_102695, Transcript_102696, Transcript_102697, Transcript_102701, Transcript_102704, Transcript_102705, Tra…			K04371 Transcript_14018 K04393 Transcript_69502, Transcript_69503 K07763 Transcript_2472		K04420 Transcript_41816, Transcript_41819, Transcript_108837, Transcript_108844, Transcript_108846, Transcript_108850, Transcript_108852 K04421 Transcript_41816, Transcript_41819, Transcript_108837, Transcript_108844, Transcript_108846, Transcript_108850, Transcript_108852
04913 Ovarian steroidogenesis (1)		K00461 Transcript_60732, Transcript_60735, Transcript_60739 K16342 Transcript_1208, Transcript_80584, Transcript_102695, Transcript_102696, Transcript_102697, Transcript_102701, Transcript_102704, Transcript_102705, Transcript_102709, Transcript_102711, Transcript_18711, Transcript_18712, Transcript_18713, Transcript_18715, Transcript_18716, Transcript_18717			K00512 Transcript_86898	K16620 Transcript_39062, Transcript_39064	K05087 Transcript_23849, Transcript_23858	K16620 CALLO: Transcript_52494 PARA: Transcript_39062, Transcript_39064	K16620 CALLO: Transcript_52494 PARA: Transcript_39062, Transcript_39064
04915 Estrogen signaling pathway (4)		K03283 Transcript_113779, Transcript_15689, Transcript_15690 K04448 Transcript_10875			K01403 Transcript_56894, Transcript_56902, Transcript_56904 K04371 Transcript_14018 K04615 Transcript_49843, Transcript_130335, Transcript_131772		K04215 Transcript_20963
04914 Progesterone-mediated oocyte maturation (9)		K13728 Transcript_95989			K04367 Transcript_18777 K04371 Transcript_14018 K05868 Transcript_40128, Transcript_40130 K21770 Transcript_40128, Transcript_40130		K02087 Transcript_29060, Transcript_29061, Transcript_29062 K03357 Transcript_13430 K05087 Transcript_23849, Transcript_23858 K05868 Transcript_28189, Transcript_28193, Transcript_28194, Transcript_28196 K06627 Transcript_104007, Transcript_104010, Transcript_104014, Transcript_104015 K08837 Transcript_65625 K21770 Transcript_28189, Transcript_28193, Transcript_28194, Transcript_28196 K21771 Tran…
04917 Prolactin signaling pathway (4)		K04695 Transcript_90417, Transcript_90423, Transcript_90425 K04696 Transcript_90417, Transcript_90423, Transcript_90425 K04701 Transcript_90417, Transcript_90423, Transcript_90425			K00512 Transcript_86898 K04371 Transcript_14018 K04699 Transcript_3777 K09444 Transcript_9190
04921 Oxytocin signaling pathway (7)		K04448 Transcript_10875 K04513 Transcript_8150 K04515 Transcript_29522 K16342 Transcript_1208, Transcript_80584, Transcript_102695, Transcript_102696, Transcript_102697, Transcript_102701, Transcript_102704, Transcript_102705, Transcript_102709, Transcript_102711, Transcript_18711, Transcript_18712, Transcript_18713, Transcript_18715, Transcript_18716, Transcript_18717		K06269 Transcript_70303	K04371 Transcript_14018 K04513 Transcript_40207, Transcript_40211, Transcript_29196, Transcript_29198, Transcript_29200		K04513 Transcript_61247, Transcript_61249, Transcript_61252, Transcript_61259 K05692 Transcript_70692, Transcript_70693, Transcript_70698, Transcript_85504 K07359 Transcript_80068 K12755 Transcript_11861, Transcript_11862
04926 Relaxin signaling pathway (6)		K04448 Transcript_10875 K06236 Transcript_39312, Transcript_56009, Transcript_71746 K19720 Transcript_56009, Transcript_71746			K01403 Transcript_56894, Transcript_56902, Transcript_56904 K04371 Transcript_14018		K04306 Transcript_79144 K04307 Transcript_79144 K04536 Transcript_117355, Transcript_132455 K19720 Transcript_71756, Transcript_71764, Transcript_71768
04935 Growth hormone synthesis, secretion and action (4)		K04498 Transcript_33840, Transcript_33842, Transcript_95320 K04695 Transcript_90417, Transcript_90423, Transcript_90425 K04696 Transcript_90417, Transcript_90423, Transcript_90425 K09028 Transcript_10875			K04371 Transcript_14018		K04218 Transcript_20963
04918 Thyroid hormone synthesis (4)							K00432 Transcript_4708 K04249 Transcript_57852
04919 Thyroid hormone signaling pathway (2)		K02599 Transcript_64029, Transcript_64041, Transcript_26495 K04498 Transcript_33840, Transcript_33842, Transcript_95320			K02599 Transcript_82624, Transcript_82635, Transcript_9782 K04371 Transcript_14018 K04451 Transcript_54056, Transcript_54058, Transcript_54059 K08187 Transcript_3136		K02599 Transcript_96975 K05692 Transcript_70692, Transcript_70693, Transcript_70698, Transcript_85504
04928 Parathyroid hormone synthesis, secretion and action (4)		K03068 Transcript_88815 K04449 Transcript_10875 K04513 Transcript_8150 K04612 Transcript_71194, Transcript_71203 K07763 Transcript_93554, Transcript_93556, Transcript_93557, Transcript_104281, Transcript_104282, Transcript_104283, Transcript_104284, Transcript_104285, Transcript_104286, Transcript_29472 K07997 Transcript_93556, Transcript_93557, Transcript_104281, Transcript_104282, Transcript_10…			K03068 Transcript_88806, Transcript_88807, Transcript_88810, Transcript_88814, Transcript_88816 K04362 Transcript_65527, Transcript_65528 K04371 Transcript_14018 K04513 Transcript_40207, Transcript_40211, Transcript_29196, Transcript_29198, Transcript_29200 K07763 Transcript_2472	K04362 Transcript_175758, Transcript_175759, Transcript_175763, Transcript_175771	K04513 Transcript_61247, Transcript_61249, Transcript_61252, Transcript_61259	K04362 CALLO: Transcript_82227 PARA: Transcript_175758, Transcript_175759, Transcript_175763, Transcript_175771	K04362 CALLO: Transcript_82227 PARA: Transcript_175758, Transcript_175759, Transcript_175763, Transcript_175771
04916 Melanogenesis (4)		K03209 Transcript_15019, Transcript_29256 K04498 Transcript_33840, Transcript_33842, Transcript_95320 K04515 Transcript_29522			K04371 Transcript_14018	K02432 Transcript_179998	K00445 Transcript_12306 K02432 Transcript_22238
04924 Renin secretion (4)		K04265 Transcript_66260, Transcript_73523, Transcript_73524, Transcript_6199, Transcript_100147, Transcript_14996, Transcript_14997		K13755 Transcript_206885
04614 Renin-angiotensin system (2)					K11141 Transcript_72380		K11140 Transcript_53129, Transcript_53131, Transcript_53132, Transcript_53133, Transcript_53134 K11141 Transcript_53129, Transcript_53131, Transcript_53132, Transcript_53133, Transcript_53134
04925 Aldosterone synthesis and secretion (3)		K04515 Transcript_29522					K04854 Transcript_87710
04927 Cortisol synthesis and secretion (3)					K00512 Transcript_86898		K04854 Transcript_87710
Circulatory system
04260 Cardiac muscle contraction (2)							K05849 Transcript_65287
04261 Adrenergic signaling in cardiomyocytes (3)		K04137 Transcript_58558 K04515 Transcript_29522		K06269 Transcript_70303	K04371 Transcript_14018		K05849 Transcript_65287
04270 Vascular smooth muscle contraction (5)		K01047 Transcript_25538 K04137 Transcript_58558 K04513 Transcript_8150 K16342 Transcript_1208, Transcript_80584, Transcript_102695, Transcript_102696, Transcript_102697, Transcript_102701, Transcript_102704, Transcript_102705, Transcript_102709, Transcript_102711, Transcript_18711, Transcript_18712, Transcript_18713, Transcript_18715, Transcript_18716, Transcript_18717		K06269 Transcript_70303	K01047 Transcript_25540 K04266 Transcript_11279 K04371 Transcript_14018 K04513 Transcript_40207, Transcript_40211, Transcript_29196, Transcript_29198, Transcript_29200		K04513 Transcript_61247, Transcript_61249, Transcript_61252, Transcript_61259 K04577 Transcript_41747 K12755 Transcript_11861, Transcript_11862
Digestive system
04970 Salivary secretion (3)		K04137 Transcript_58558 K13912 Transcript_99756				K13912 Transcript_37177	K13912 Transcript_96975	K13912 CALLO: Transcript_89349, Transcript_89364 PARA:	K13912 CALLO: Transcript_89349, Transcript_89364 PARA:
04971 Gastric acid secretion (5)		K04515 Transcript_29522					K04150 Transcript_20963 K04218 Transcript_20963 K05692 Transcript_70692, Transcript_70693, Transcript_70698, Transcript_85504
04972 Pancreatic secretion (4)		K01047 Transcript_25538 K01312 Transcript_56401, Transcript_121631 K01345 Transcript_64983 K01346 Transcript_64983 K04513 Transcript_8150 K09632 Transcript_56397			K01047 Transcript_25540 K01345 Transcript_15452 K01346 Transcript_15452 K04513 Transcript_40207, Transcript_40211, Transcript_29196, Transcript_29198, Transcript_29200	K14073 Transcript_24413 K14074 Transcript_24415 K14075 Transcript_24413, Transcript_24415	K04194 Transcript_20963 K04513 Transcript_61247, Transcript_61249, Transcript_61252, Transcript_61259
04976 Bile secretion (3)		K05658 Transcript_98810 K05659 Transcript_98810 K05681 Transcript_4817				K05673 Transcript_216922, Transcript_217927, Transcript_285300
04973 Carbohydrate digestion and absorption (2)		K01229 Transcript_84694 K12047 Transcript_72013
04974 Protein digestion and absorption (5)		K01312 Transcript_56401, Transcript_121631 K01345 Transcript_64983 K01346 Transcript_64983 K06236 Transcript_39312, Transcript_56009, Transcript_71746 K06238 Transcript_43318, Transcript_43325, Transcript_43328, Transcript_16465, Transcript_16466 K08606 Transcript_41522, Transcript_41523, Transcript_41526, Transcript_81651, Transcript_81655, Transcript_81656, Transcript_81657, Transcript_81659, T…			K01345 Transcript_15452 K01346 Transcript_15452 K08187 Transcript_3136		K05849 Transcript_65287 K06236 Transcript_71756, Transcript_71764, Transcript_71768 K06238 Transcript_16532, Transcript_17234 K08606 Transcript_15449 K19720 Transcript_71756, Transcript_71764, Transcript_71768
04975 Fat digestion and absorption (2)		K01047 Transcript_25538			K01047 Transcript_25540	K14073 Transcript_24413 K14074 Transcript_24415 K14075 Transcript_24413, Transcript_24415	K14457 Transcript_60084
04979 Cholesterol metabolism (1)					K04550 Transcript_87266	K04550 Transcript_132211, Transcript_132214
04977 Vitamin digestion and absorption (1)		K14386 Transcript_85592 K14616 Transcript_59049			K14613 Transcript_44931, Transcript_44932	K14073 Transcript_24413
04978 Mineral absorption (3)					K14613 Transcript_44931, Transcript_44932 K14736 Transcript_95373		K05849 Transcript_65287 K14686 Transcript_83151, Transcript_83155 K14710 Transcript_13910
Excretory system
04960 Aldosterone-regulated sodium reabsorption (1)					K04371 Transcript_14018
04961 Endocrine and other factor-regulated calcium reabsorption (3)							K05849 Transcript_65287 K11825 Transcript_86689, Transcript_86692
04964 Proximal tubule bicarbonate reclamation (2)		K01596 Transcript_89004, Transcript_89009					K01596 Transcript_99077
Nervous system
04724 Glutamatergic synapse (4)		K05613 Transcript_8793 K05614 Transcript_8793 K15009 Transcript_20450 K16342 Transcript_1208, Transcript_80584, Transcript_102695, Transcript_102696, Transcript_102697, Transcript_102701, Transcript_102704, Transcript_102705, Transcript_102709, Transcript_102711, Transcript_18711, Transcript_18712, Transcript_18713, Transcript_18715, Transcript_18716, Transcript_18717			K04371 Transcript_14018
04727 GABAergic synapse (2)		K08341 Transcript_26929			K04615 Transcript_49843, Transcript_130335, Transcript_131772
04725 Cholinergic synapse (5)		K04515 Transcript_29522			K04371 Transcript_14018		K01049 Transcript_106575, Transcript_16584, Transcript_16586, Transcript_16588
04728 Dopaminergic synapse (4)		K04515 Transcript_29522		K06269 Transcript_70303
04726 Serotonergic synapse (5)		K00461 Transcript_60732, Transcript_60735, Transcript_60739 K16342 Transcript_1208, Transcript_80584, Transcript_102695, Transcript_102696, Transcript_102697, Transcript_102701, Transcript_102704, Transcript_102705, Transcript_102709, Transcript_102711, Transcript_18711, Transcript_18712, Transcript_18713, Transcript_18715, Transcript_18716, Transcript_18717 K21278 Transcript_81504, Transcript_81…			K04371 Transcript_14018		K04160 Transcript_20963
04720 Long-term potentiation (2)		K04498 Transcript_33840, Transcript_33842, Transcript_95320 K04515 Transcript_29522		K06269 Transcript_70303	K04371 Transcript_14018
04730 Long-term depression (4)		K16342 Transcript_1208, Transcript_80584, Transcript_102695, Transcript_102696, Transcript_102697, Transcript_102701, Transcript_102704, Transcript_102705, Transcript_102709, Transcript_102711, Transcript_18711, Transcript_18712, Transcript_18713, Transcript_18715, Transcript_18716, Transcript_18717			K04371 Transcript_14018		K05087 Transcript_23849, Transcript_23858
04723 Retrograde endocannabinoid signaling (5)					K04371 Transcript_14018
04721 Synaptic vesicle cycle (1)		K05613 Transcript_8793 K05614 Transcript_8793					K11825 Transcript_86689, Transcript_86692
04722 Neurotrophin signaling pathway (3)		K03175 Transcript_57365, Transcript_57367, Transcript_57369, Transcript_57370, Transcript_88744, Transcript_88749 K04448 Transcript_10875 K04513 Transcript_8150 K04515 Transcript_29522			K04371 Transcript_14018 K04393 Transcript_69502, Transcript_69503 K04451 Transcript_54056, Transcript_54058, Transcript_54059 K04513 Transcript_40207, Transcript_40211, Transcript_29196, Transcript_29198, Transcript_29200 K10148 Transcript_54056, Transcript_54058, Transcript_54059		K03175 Transcript_46240, Transcript_46241, Transcript_68501, Transcript_92993, Transcript_92994, Transcript_92997, Transcript_92998, Transcript_93000, Transcript_93001, Transcript_93003, Transcript_93005, Transcript_93006, Transcript_13821 K04421 Transcript_41816, Transcript_41819, Transcript_108837, Transcript_108844, Transcript_108846, Transcript_108850, Transcript_108852 K04513 Transcript_6124…
Sensory system
04744 Phototransduction (1)
04745 Phototransduction - fly (4)		K04515 Transcript_29522 K13802 Transcript_83086					K05692 Transcript_70692, Transcript_70693, Transcript_70698, Transcript_85504 K08834 Transcript_100609, Transcript_100612, Transcript_100623
04740 Olfactory transduction (3)		K04515 Transcript_29522		K13755 Transcript_206885			K05849 Transcript_65287
04742 Taste transduction (3)				K13755 Transcript_206885	K04615 Transcript_49843, Transcript_130335, Transcript_131772		K04828 Transcript_17824 K04989 Transcript_13429
04750 Inflammatory mediator regulation of TRP channels (4)		K04515 Transcript_29522 K16342 Transcript_1208, Transcript_80584, Transcript_102695, Transcript_102696, Transcript_102697, Transcript_102701, Transcript_102704, Transcript_102705, Transcript_102709, Transcript_102711, Transcript_18711, Transcript_18712, Transcript_18713, Transcript_18715, Transcript_18716, Transcript_18717		K06269 Transcript_70303	K04984 Transcript_102523, Transcript_102526		K04828 Transcript_17824 K04829 Transcript_17824
Development and regeneration
04320 Dorso-ventral axis formation (1)		K02599 Transcript_64029, Transcript_64041, Transcript_26495 K02678 Transcript_86101, Transcript_86102			K02599 Transcript_82624, Transcript_82635, Transcript_9782 K04371 Transcript_14018		K02599 Transcript_96975
04360 Axon guidance (4)		K04513 Transcript_8150 K04515 Transcript_29522 K06093 Transcript_99822, Transcript_99827			K04371 Transcript_14018 K04393 Transcript_69502, Transcript_69503 K04513 Transcript_40207, Transcript_40211, Transcript_29196, Transcript_29198, Transcript_29200 K05104 Transcript_59827, Transcript_59830 K05105 Transcript_59827, Transcript_59830 K05106 Transcript_59827, Transcript_59830, Transcript_79928 K05108 Transcript_59827, Transcript_59830 K05110 Transcript_59827, Transcript_59830	K06225 Transcript_46440	K04513 Transcript_61247, Transcript_61249, Transcript_61252, Transcript_61259 K12755 Transcript_11861, Transcript_11862 K12757 Transcript_11861, Transcript_11862	K06225 CALLO: Transcript_80713 PARA: Transcript_46440 K06838 CALLO: Transcript_54623, Transcript_54626 PARA: K06839 CALLO: Transcript_54623, Transcript_54626 PARA: K06850 CALLO: Transcript_54623, Transcript_54626 PARA: K16621 CALLO: Transcript_52494 PARA:	K06225 CALLO: Transcript_80713 PARA: Transcript_46440 K06838 CALLO: Transcript_54623, Transcript_54626 PARA: K06839 CALLO: Transcript_54623, Transcript_54626 PARA: K06850 CALLO: Transcript_54623, Transcript_54626 PARA: K16621 CALLO: Transcript_52494 PARA:
04361 Axon regeneration (3)		K02599 Transcript_64029, Transcript_64041, Transcript_26495 K04459 Transcript_81504, Transcript_81507, Transcript_81509 K04513 Transcript_8150 K04688 Transcript_35196, Transcript_35197, Transcript_35198 K09442 Transcript_110196 K12035 Transcript_90302, Transcript_90303			K02599 Transcript_82624, Transcript_82635, Transcript_9782 K04513 Transcript_40207, Transcript_40211, Transcript_29196, Transcript_29198, Transcript_29200 K05110 Transcript_59827, Transcript_59830 K12035 Transcript_8181		K02599 Transcript_96975 K04513 Transcript_61247, Transcript_61249, Transcript_61252, Transcript_61259	K06839 CALLO: Transcript_54623, Transcript_54626 PARA:	K06839 CALLO: Transcript_54623, Transcript_54626 PARA:
04380 Osteoclast differentiation (2)		K03173 Transcript_67632, Transcript_88747, Transcript_101664 K03175 Transcript_57365, Transcript_57367, Transcript_57369, Transcript_57370, Transcript_88744, Transcript_88749 K04448 Transcript_10875 K04449 Transcript_10875 K04696 Transcript_90417, Transcript_90423, Transcript_90425 K09028 Transcript_10875			K03173 Transcript_56482, Transcript_56486, Transcript_56487, Transcript_81096, Transcript_81101, Transcript_81102, Transcript_93309, Transcript_101662, Transcript_101665, Transcript_101668, Transcript_101669 K04371 Transcript_14018 K14379 Transcript_117409 K14381 Transcript_66082		K03173 Transcript_56483, Transcript_57116 K03175 Transcript_46240, Transcript_46241, Transcript_68501, Transcript_92993, Transcript_92994, Transcript_92997, Transcript_92998, Transcript_93000, Transcript_93001, Transcript_93003, Transcript_93005, Transcript_93006, Transcript_13821
Aging
04211 Longevity regulating pathway (2)		K04688 Transcript_35196, Transcript_35197, Transcript_35198 K05638 Transcript_30556 K08341 Transcript_26929			K04451 Transcript_54056, Transcript_54058, Transcript_54059 K00799 Transcript_64330 K08035 Transcript_1649	K10798 Transcript_262170, Transcript_262178	K05087 Transcript_23849, Transcript_23858 K07359 Transcript_80068
Environmental adaptation
04713 Circadian entrainment (5)		K04515 Transcript_29522			K04371 Transcript_14018		K04854 Transcript_87710
04712 Circadian rhythm - plant (1)							K10143 Transcript_73588
04714 Thermogenesis (4)		K04688 Transcript_35196, Transcript_35197, Transcript_35198 K18180 Transcript_14491			K04362 Transcript_65527, Transcript_65528	K04362 Transcript_175758, Transcript_175759, Transcript_175763, Transcript_175771	K00418 Transcript_101559 K05692 Transcript_70692, Transcript_70693, Transcript_70698, Transcript_85504 K09008 Transcript_93581	K04362 CALLO: Transcript_82227 PARA: Transcript_175758, Transcript_175759, Transcript_175763, Transcript_175771	K04362 CALLO: Transcript_82227 PARA: Transcript_175758, Transcript_175759, Transcript_175763, Transcript_175771
04626 Plant-pathogen interaction (1)							K01373 Transcript_60440, Transcript_60442
